# Supplementary material for: Targeted sequencing and integrative analysis to prioritize candidate genes in neurodevelopmental disorders
Source: PubMed Central journal article supplement (PMC8280036; doi:10.1007/s12035-021-02377-y), 2021-04-15

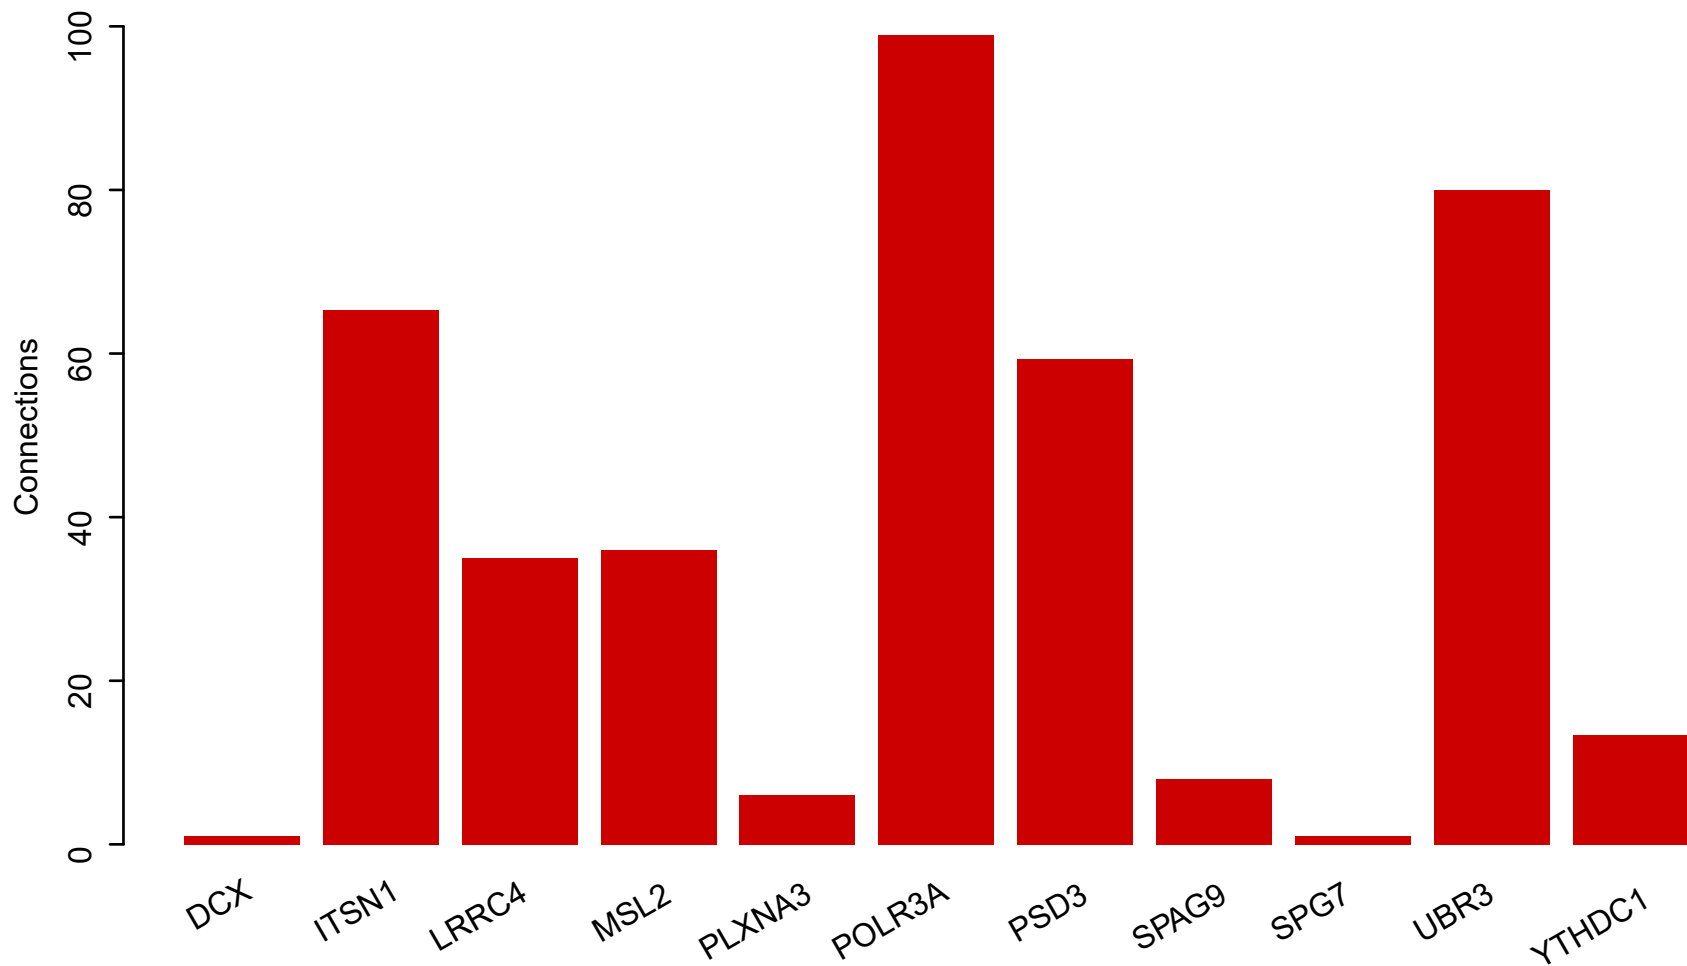

Supplement: 12035_2021_2377_MOESM6_ESM.pdf [file 12035_2021_2377_MOESM6_ESM.pdf]
